# Supplementary material for: A corn-inspired structure design for an iron oxide fiber/reduced graphene oxide composite as a high-performance anode material for Li-ion batteries
Source: Royal Society of Chemistry journal article supplement (doi:10.1039/c7ra08846a), 2017-01-01
Supplement: c7ra08846a1.pdf [file c7ra08846a1.pdf]

## Electronic supporting Materials

### **A Corn-Inspired Structure Design for Iron Oxide Fiber/ Reduced Graphene Oxide Composite as High-Performance Anodes Materials for Li-Ion Batteries**

Jianxin Cai<sup>1</sup>, Pengfei Zhao<sup>1</sup>, Zhipeng Li<sup>1</sup>, Wei Li<sup>1</sup>, Jing Zhong<sup>3</sup>, Ji Yu<sup>2</sup>, Zhenyu Yang<sup>2,\*1</sup>

<sup>1</sup>School of Resources Environmental and Chemical Engineering, Nanchang University, No.999, Xuefu Road, Nanchang, Jiangxi, China.

<sup>2</sup>School of Chemistry, Nanchang University, No.999, Xuefu Road, Nanchang, Jiangxi, China.

<sup>3</sup>School of Civil Engineering, Harbin Institute of Technology, Heilongjiang 150090, P. R. China

\*Corresponding authors: Zhenyu Yang (zyyang@ncu.edu.cn)

---

<sup>1</sup> \* Corresponding authors: Zhenyu Yang, +86-791-83969514, Email: zyyang@ncu.edu.cn

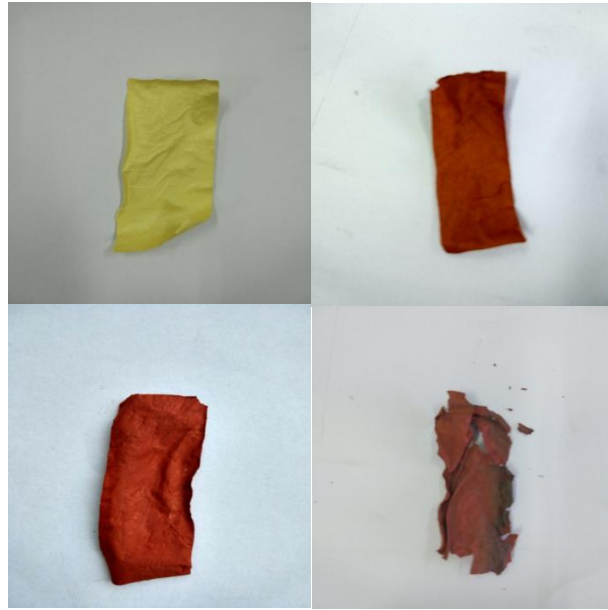

Figure S1: Picture of the electrospinning equipment, and optical image of the as-deposited PVP/FeCl<sub>3</sub> fiber film (yellow) and the Fe<sub>2</sub>O<sub>3</sub> fibers films obtained by an annealing process at 600 °C in air (three concentrations of FeCl<sub>3</sub> ).

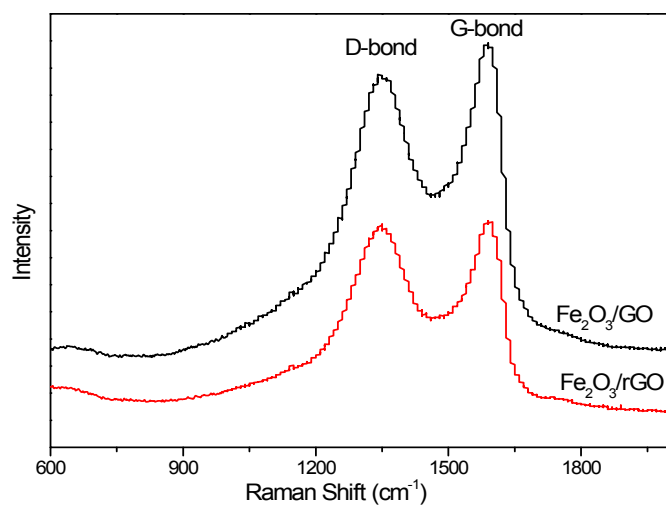

Figure S2 the Raman spectrum of the Fe<sub>2</sub>O<sub>3</sub> /rGO samples before and after Far Infrared irradiation reduction

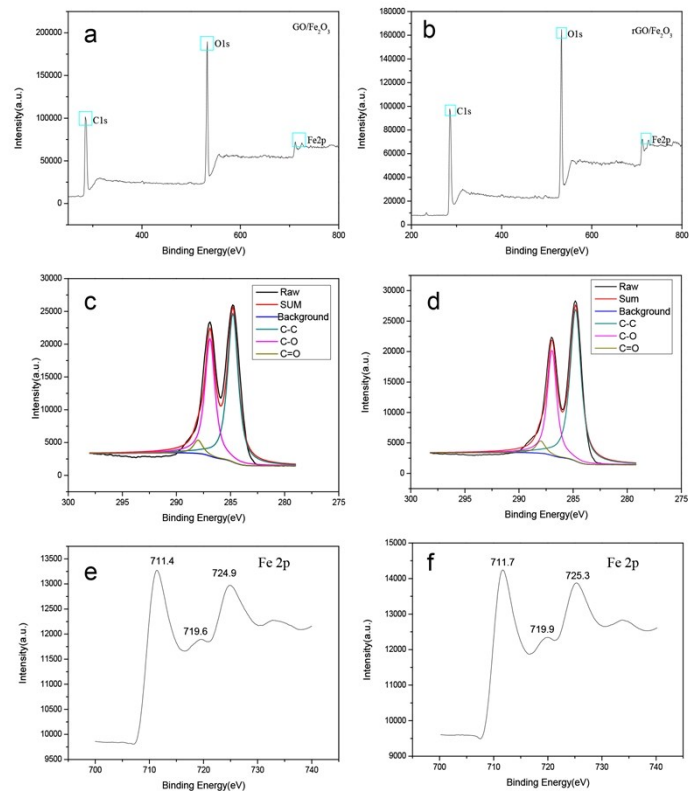

Figure S3 The C1s XPS spectra of  $\text{Fe}_2\text{O}_3$  /rGO composites before and after FIR irradiation reduction

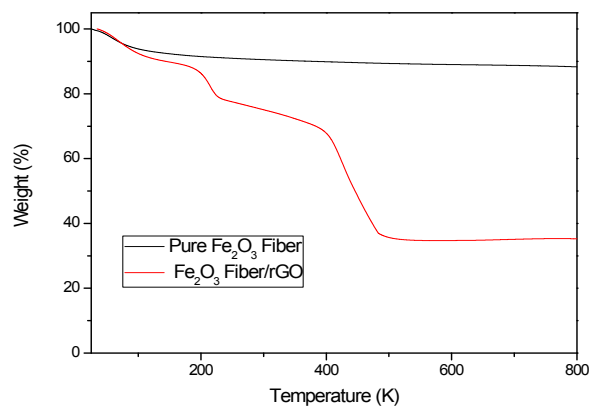

Figure S4 The TG curves for the samples of pure  $\text{Fe}_2\text{O}_3$  fibers and  $\text{Fe}_2\text{O}_3$  /rGO composites.

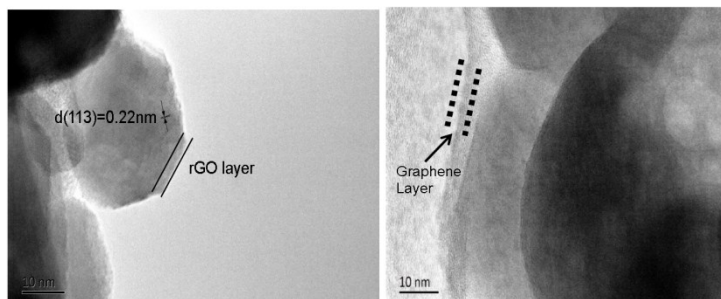

Figure S5 The HRTEM images for  $\text{Fe}_2\text{O}_3$ /rGO composites. (the lattices with a lattice fringe spacing of 0.22 nm are indexed to the (113) plane of  $\alpha\text{-Fe}_2\text{O}_3$ , and the thickness of rGO is about 3 nm)

Figure S6 Nitrogen adsorption-desorption isotherm and the corresponding pore size distribution of the  $\text{Fe}_2\text{O}_3$  fiber and  $\text{Fe}_2\text{O}_3$  fiber/rGO composite.

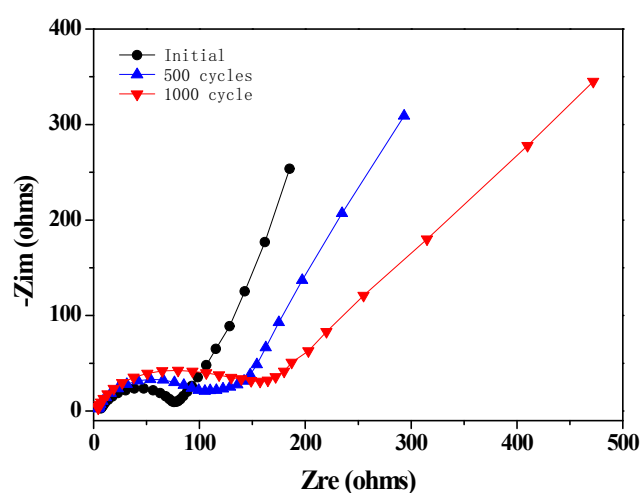

Figure S7 Electrochemical impedance spectroscopy (EIS) measurements were conducted after initial, 500, and 1000 cycles to understand the electrochemical stability of  $\text{Fe}_2\text{O}_3$  /rGO composite electrode, .
